# Supplementary material for: Transcriptome-wide analysis of immune-responsive microRNAs against poly (I:C) challenge in Branchiostoma belcheri by deep sequencing and bioinformatics
Source: PubMed Central journal article supplement (PMC5650284; doi:10.18632/oncotarget.20570), 2017-08-28
Supplement: oncotarget-08-73590-s001.pdf [file oncotarget-08-73590-s001.pdf]

# Transcriptome-wide analysis of immune-responsive microRNAs against poly (I:C) challenge in *Branchiostoma belcheri* by deep sequencing and bioinformatics

## SUPPLEMENTARY MATERIALS

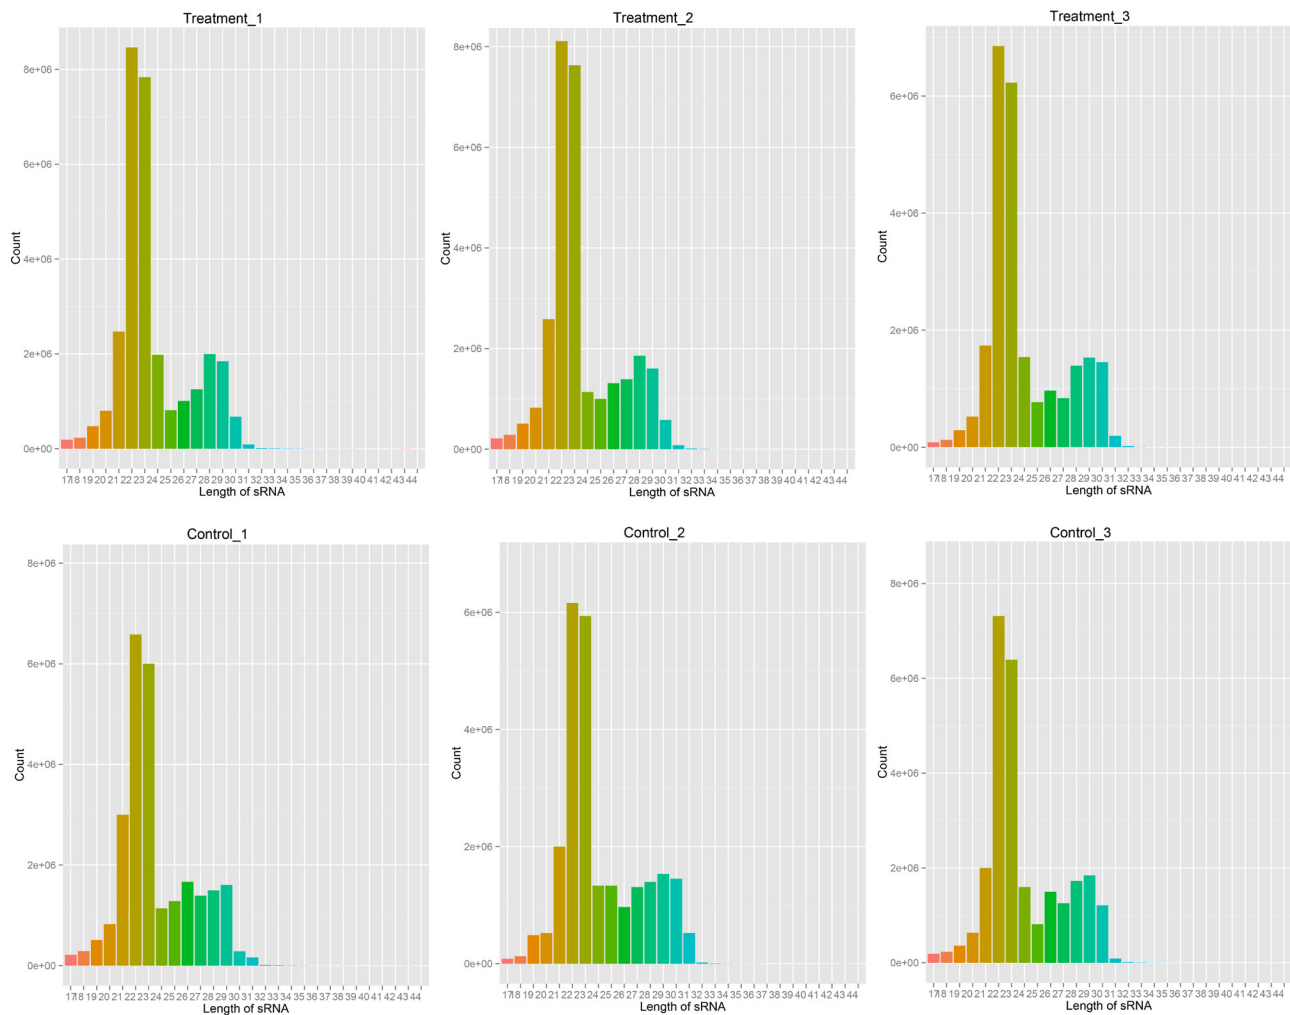

Supplementary Figure 1: Size-class distribution of sRNAs in libraries of control and treatment groups.

**Supplementary Table 1: Summary of deep sequencing information for each sample.**

| Category                               | Control            |                    |                    | Treatment          |                    |                    |
|----------------------------------------|--------------------|--------------------|--------------------|--------------------|--------------------|--------------------|
|                                        | Control_rep1       | Control_rep2       | Control_rep3       | pIC_rep1           | pIC_rep2           | pIC_rep3           |
| Raw tags                               | 28,903,383         | 29,591,548         | 30,135,882         | 31,297,892         | 29,856,971         | 30,077,907         |
| Clean tags (%)                         | 28,217,786 (97.63) | 28,742,324 (97.13) | 29,235,146 (97.01) | 29,965,063 (95.74) | 28,815,576 (96.51) | 29,191,246 (97.05) |
| Total clean tags mapping to genome (%) | 79.09              | 79.41              | 78.82              | 83.18              | 83.74              | 81.47              |
| miRNA tag (%)                          | 8,801,127 (31.19)  | 8,526,768 (29.67)  | 8,325,221 (28.48)  | 11,419,686 (38.11) | 11,310,345 (39.25) | 11,728,527 (40.18) |
| Known miRNAs                           | 162                | 165                | 164                | 169                | 168                | 168                |
| Novel miRNAs                           | 211                | 222                | 215                | 217                | 220                | 214                |

**Supplementary Table 2: Top 30 known miRNA identified in the *B. belcheri* control and that challenged with pIC.**

| Id               | Family   | Average_control_TPM | Average_treatment_TPM |
|------------------|----------|---------------------|-----------------------|
| bbe-let-7a-2-3p  | let-7    | 2172.32             | 185891.61             |
| bbe-let-7a-3p    | let-7    | 1243.52             | 123348.65             |
| bbe-let-7a-5p    | let-7    | 9485.79             | 63595.86              |
| bbe-miR-10a-5p   | mir-10   | 847.58              | 67538.38              |
| bbe-miR-100-3p   | mir-100  | 8736.69             | 40862.07              |
| bbe-miR-100-5p   | mir-100  | 17634.04            | 31875.20              |
| bbe-miR-10c-5p   | mir-10   | 55.60               | 45692.51              |
| bbe-miR-10a-3p   | mir-10   | 772.44              | 44091.07              |
| bbe-miR-10b-3p   | mir-10   | 678.58              | 37706.81              |
| bbe-miR-125a-3p  | mir-125  | 311.81              | 35424.24              |
| bbe-miR-137-3p   | mir-137  | 4.81                | 29574.46              |
| bbe-miR-2069-3p  | mir-2069 | 9.79                | 25787.58              |
| bbe-miR-124-5p   | mir-124  | 2.05                | 25721.47              |
| bbe-miR-2063-3p  | mir-2063 | 0.93                | 20464.13              |
| bbe-miR-92b-3p   | mir-25   | 18340.31            | 1.18                  |
| bbe-miR-10b-5p   | mir-10   | 474.57              | 17437.20              |
| bbe-miR-125b-3p  | mir-125  | 95.26               | 17782.68              |
| bbe-miR-125a-5p  | mir-125  | 282.10              | 13998.12              |
| bbe-miR-2060a-3p | mir-2060 | 0.08                | 11190.28              |
| bbe-miR-129a-3p  | mir-129  | 0.50                | 9809.73               |
| bbe-miR-135a-3p  | mir-135  | 99.94               | 8995.85               |
| bbe-miR-133-3p   | mir-133  | 0.16                | 8537.26               |
| bbe-miR-129b-5p  | mir-129  | 0.00                | 7175.64               |
| bbe-miR-129a-5p  | mir-129  | 0.59                | 6472.75               |
| bbe-miR-1-3p     | mir-1    | 0.04                | 6053.53               |
| bbe-miR-135a-5p  | mir-135  | 398.36              | 5513.87               |
| bbe-miR-133-5p   | mir-133  | 607.82              | 5222.60               |
| bbe-miR-92a-3p   | mir-92   | 5488.27             | 0.00                  |
| bbe-miR-2057-3p  | mir-2057 | 427.54              | 4347.71               |
| bbe-miR-153-3p   | mir-153  | 0.75                | 4689.24               |

**Supplementary Table 3: Top 30 novel miRNA identified in the B. belcheri control and that challenged with pIC.**

| Id           | Location                       | Mature sequences (5'-3') | Expression values in control (TPM) | Expression values in treatment (TPM) |
|--------------|--------------------------------|--------------------------|------------------------------------|--------------------------------------|
| novel_mir51  | NW_017804298:1615783:1_1615720 | uuuggcacugguacuauuggagu  | 3278.79                            | 17782.68                             |
| novel_mir2   | NW_017804043:1856531:1_1856471 | acgcguuuauugucugcgccugu  | 107.45                             | 446.26                               |
| novel_mir108 | NW_017804464:1170457:1_1170396 | gauguuuguacugucugucuguu  | 91.60                              | 432.37                               |
| novel_mir122 | NW_017804254:1382901:1_1382827 | gguucgauucccggauggg      | 54.19                              | 308.07                               |
| novel_mir1   | NW_017802636:57725:1_57668     | cacuggccucucagucuuuga    | 112.29                             | 196.17                               |
| novel_mir125 | NW_017802991:130339:1_130252   | uugucccgagcaguugg        | 32.36                              | 261.34                               |
| novel_mir4   | NW_017802636:61269:1_61202     | uacuggcucgccaagucuuugu   | 29.29                              | 181.04                               |
| novel_mir5   | NW_017803943:382537:1_382478   | uaguugccggcguggaaaagu    | 23.11                              | 157.68                               |
| novel_mir147 | NW_017802380:3881206:1_3881160 | aguaccgagagagaccuuu      | 4.16                               | 165.63                               |
| novel_mir3   | NW_017804043:1855755:1_1855695 | ucgauugacgucagcgccggc    | 37.03                              | 98.90                                |
| novel_mir6   | NW_017802636:54788:1_54728     | aacuggcuuucuauguucuugu   | 34.23                              | 82.69                                |
| novel_mir8   | NW_017804464:2487832:1_2487773 | ugcugagguuuugauucuaugu   | 10.30                              | 100.78                               |
| novel_mir7   | NW_017803157:1989589:1_1989530 | aaggacuaaggcgacagucgg    | 28.35                              | 63.39                                |
| novel_mir50  | NW_017802379:9849414:1_9849356 | aggaagacaugguccaguugu    | 3.10                               | 87.90                                |
| novel_mir114 | NW_017802781:3374:1_3302       | agucaccgucugucggccguacga | 3.06                               | 41.84                                |
| novel_mir173 | NW_017803919:70437:1_70378     | acuggguccagccggcucuccug  | 4.54                               | 39.83                                |
| novel_mir150 | NW_017804464:2495455:1_2495396 | ucugggcauguagguuauagag   | 2.63                               | 40.17                                |
| novel_mir11  | NW_017802491:3157119:1_3157059 | ggaacggagaauccguaguugu   | 7.35                               | 31.32                                |
| novel_mir14  | NW_017803943:384553:1_384495   | uagcuggcugcaagaaaagu     | 4.74                               | 30.46                                |
| novel_mir16  | NW_017804629:4659:1_4601       | uguucucgccacggcaguuuugu  | 3.34                               | 24.79                                |
| novel_mir13  | NW_017804120:1405143:1_1405086 | cucuugccuggagagccgugcc   | 5.52                               | 20.33                                |
| novel_mir130 | NW_017803941:59115:1_59025     | caucgacccgucguuaguagacgc | 12.27                              | 12.39                                |
| novel_mir19  | NW_017802379:9931018:1_9930956 | auucggguuuauaggaacauga   | 2.34                               | 21.28                                |
| novel_mir18  | NW_017802636:58404:1_58345     | cgggacuucgagucagacgg     | 7.35                               | 15.36                                |
| novel_mir149 | NW_017804464:2490346:1_2490288 | ugcugagguuuugguucuaugu   | 2.28                               | 19.91                                |
| novel_mir138 | NW_017803769:232563:1_232495   | gccgagccggggcaggucgcccc  | 19.09                              | 0.27                                 |
| novel_mir82  | NW_017803158:232597:1_232530   | guaccaucuggauuuucgu      | 2.13                               | 16.87                                |
| novel_mir164 | NW_017804464:3138824:1_3138765 | uuggguuaucaauagagcuuca   | 2.48                               | 16.50                                |
| novel_mir181 | NW_017804265:514561:1_514494   | uguucgaucacgucgggu       | 3.12                               | 15.70                                |
| novel_mir69  | NW_017802414:43994:1_43928     | uugcguagcgaaaaucggaug    | 3.89                               | 14.25                                |

**Supplementary Table 4: List of the KEGG pathway of targeted genes of differentially expressed miRNA between *B. belcheri* control and that challenged with pIC.**

| Pathway                                                | Pathway id | P-value  | FDR      |
|--------------------------------------------------------|------------|----------|----------|
| Tight junction                                         | ko04530    | 3.16E-08 | 9.71E-05 |
| Dilated cardiomyopathy                                 | ko05414    | 3.50E-07 | 5.37E-05 |
| Arrhythmogenic right ventricular cardiomyopathy (ARVC) | ko05412    | 1.25E-06 | 1.28E-04 |
| Platelet activation                                    | ko04611    | 4.61E-06 | 3.54E-04 |
| Retrograde endocannabinoid signaling                   | ko04723    | 6.12E-06 | 3.76E-04 |
| Adherens junction                                      | ko04520    | 8.73E-06 | 4.46E-04 |
| Carbohydrate digestion and absorption                  | ko04973    | 1.30E-05 | 5.70E-04 |
| Hypertrophic cardiomyopathy (HCM)                      | ko05410    | 5.57E-05 | 2.14E-03 |
| NF-kappa B signaling pathway                           | ko04064    | 7.70E-05 | 2.63E-03 |
| NOD-like receptor signaling pathway                    | ko04621    | 8.64E-05 | 2.65E-03 |
| MAPK signaling pathway                                 | ko04010    | 1.10E-04 | 2.90E-03 |
| Thyroid hormone signaling pathway                      | ko04919    | 1.20E-04 | 2.90E-03 |
| Type II diabetes mellitus                              | ko04930    | 1.23E-04 | 2.90E-03 |
| Endocytosis                                            | ko04144    | 1.38E-04 | 3.03E-03 |
| GABAergic synapse                                      | ko04727    | 1.63E-04 | 3.35E-03 |
| Chemokine signaling pathway                            | ko04062    | 1.97E-04 | 3.78E-03 |
| Viral carcinogenesis                                   | ko05203    | 2.11E-04 | 3.81E-03 |
| Cholinergic synapse                                    | ko04725    | 2.97E-04 | 5.07E-03 |
| Salmonella infection                                   | ko05132    | 3.77E-04 | 6.09E-03 |
| Galactose metabolism                                   | ko00052    | 5.15E-04 | 7.73E-03 |
| RNA transport                                          | ko03013    | 5.29E-04 | 7.73E-03 |
| Hepatitis C                                            | ko05160    | 5.90E-04 | 8.23E-03 |
| Ubiquitin mediated proteolysis                         | ko04120    | 6.62E-04 | 8.84E-03 |
| Focal adhesion                                         | ko04510    | 7.77E-04 | 9.71E-03 |
| Cardiac muscle contraction                             | ko04260    | 7.91E-04 | 9.71E-03 |
| MicroRNAs in cancer                                    | ko05206    | 8.41E-04 | 9.93E-03 |
| Influenza A                                            | ko05164    | 9.01E-04 | 1.02E-02 |
| Starch and sucrose metabolism                          | ko00500    | 1.07E-03 | 1.17E-02 |
| ECM-receptor interaction                               | ko04512    | 1.20E-03 | 1.27E-02 |
| ErbB signaling pathway                                 | ko04012    | 1.35E-03 | 1.34E-02 |
| Progesterone-mediated oocyte maturation                | ko04914    | 1.35E-03 | 1.34E-02 |
| Central carbon metabolism in cancer                    | ko05230    | 1.67E-03 | 1.59E-02 |
| Glycolysis / Gluconeogenesis                           | ko00010    | 1.71E-03 | 1.59E-02 |
| HTLV-I infection                                       | ko05166    | 2.58E-03 | 1.98E-02 |
| Vasopressin-regulated water reabsorption               | ko04962    | 2.82E-03 | 2.10E-02 |
| Serotonergic synapse                                   | ko04726    | 2.87E-03 | 2.10E-02 |
| Prion diseases                                         | ko05020    | 3.63E-03 | 2.59E-02 |
| Jak-STAT signaling pathway                             | ko04630    | 3.84E-03 | 2.64E-02 |
| Pancreatic secretion                                   | ko04972    | 3.87E-03 | 2.64E-02 |
| Notch signaling pathway                                | ko04330    | 4.12E-03 | 2.75E-02 |
| RIG-I-like receptor signaling pathway                  | ko04622    | 5.00E-03 | 3.27E-02 |
| Viral myocarditis                                      | ko05416    | 5.16E-03 | 3.29E-02 |

**Supplementary Table 5: The predicted immune-related KEGG pathway analysis of targeted genes in *B. belcheri* challenged by poly (I:C).**

**Supplementary Table 6: Primers used in quantitative RT-PCR.**

| Gene id         | Primer sequence (5'-3')   |
|-----------------|---------------------------|
| bbe-miR-184-5p  | GGCGGCCCTTATCACTTCTTCC    |
| bbe-miR-200b-3p | TTCATCGGCTTACCAGGCAGCA    |
| bbe-miR-4887-5p | TGCGGCGGTTCTCGATTGTTCT    |
| bbe-miR-2070-5p | TGGAGGTGGTTTCCACAGCCTCTAC |
| bbe-miR-4869-3p | GTTGCGGAGGGACCTGTAGTCAAC  |
| bbe-miR-92d-3p  | GGGCGGCTATTGCACTTATCCTG   |
| novel_mir114    | ATAAAGTCACCGTCTGTCGGCCC   |
| novel_mir193    | GCGCAATCCACAGTGATTTTGG    |
| novel_mir130    | ATCATCGACGCCGTCCGTTGT     |
| novel_mir148    | GCGTTGGGAGTCAGGACACCAT    |
